# Supplementary material for: Interaction of TiO+ with water: infrared photodissociation spectroscopy and density functional calculations
Source: Royal Society of Chemistry journal article supplement (doi:10.1039/c3cp52823e), 2013-01-01
Supplement: c3cp52823e.pdf [file c3cp52823e.pdf]

## *Supplementary Information*

### **Interaction of $\text{TiO}^+$ with water : Infrared photodissociation spectroscopy and density functional calculations**

Hong-Guang Xu<sup>1</sup>, Xiao-Na Li<sup>2\*</sup>, Xiangyu Kong<sup>1</sup>, Sheng-Gui He<sup>2</sup>, Weijun Zheng<sup>1\*</sup>

<sup>1</sup>*Beijing National Laboratory for Molecular Sciences, State Key Laboratory of Molecular Reaction Dynamics, Institute of Chemistry, Chinese Academy of Sciences, Beijing 100190, China*

<sup>2</sup>*Beijing National Laboratory for Molecular Sciences, State Key Laboratory for Structural Chemistry of Unstable and Stable Species, Institute of Chemistry, Chinese Academy of Sciences, Beijing 100190, China*

\* Corresponding authors. E-mail: zhengwj@iccas.ac.cn, lxn@iccas.ac.cn

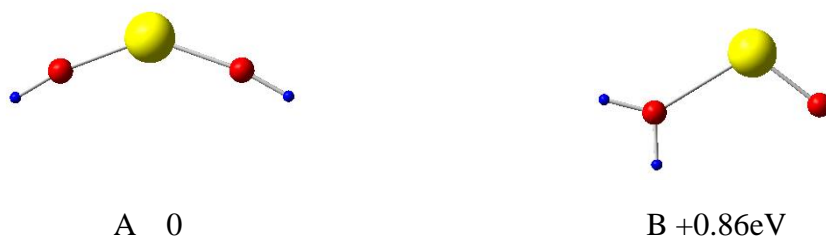

**Figure S1** Optimized geometries of the typical low-lying isomers of  $\text{TiO}(\text{H}_2\text{O})^+$  cluster obtained at B3LPY/6-311G+(d, p) level. The relative energy to the most stable isomer is shown. The yellow, red and blue spheres stand for Ti, O and H atoms, respectively.

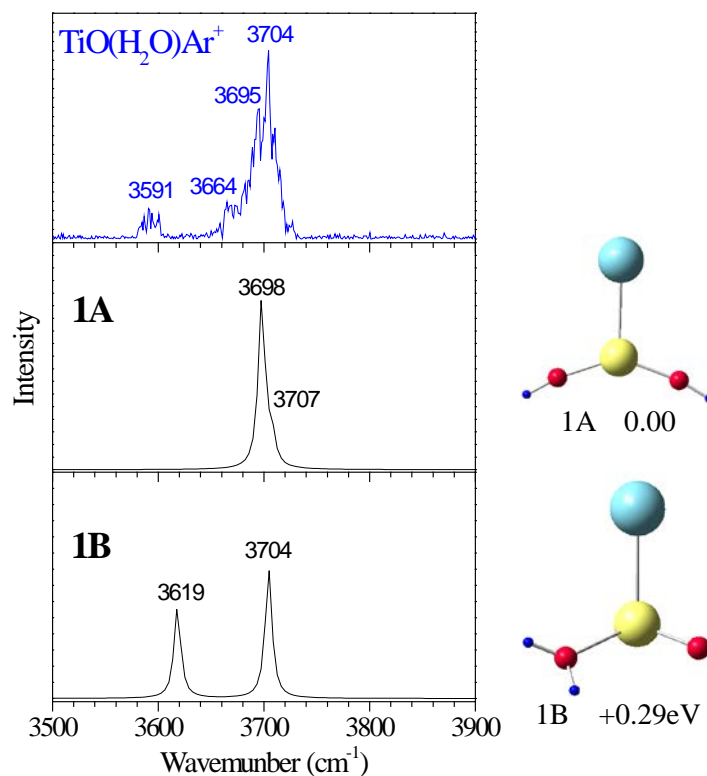

**Figure S2.** IRPD spectrum of  $\text{TiO}(\text{H}_2\text{O})\text{Ar}^+$  cluster and the simulated theoretical IR spectra of its low-lying isomers obtained at MP2/6-311G+ (d, p) level. The theoretical IR spectra were produced by using Lorentzian components with a full width at half-maximum of  $10 \text{ cm}^{-1}$ .

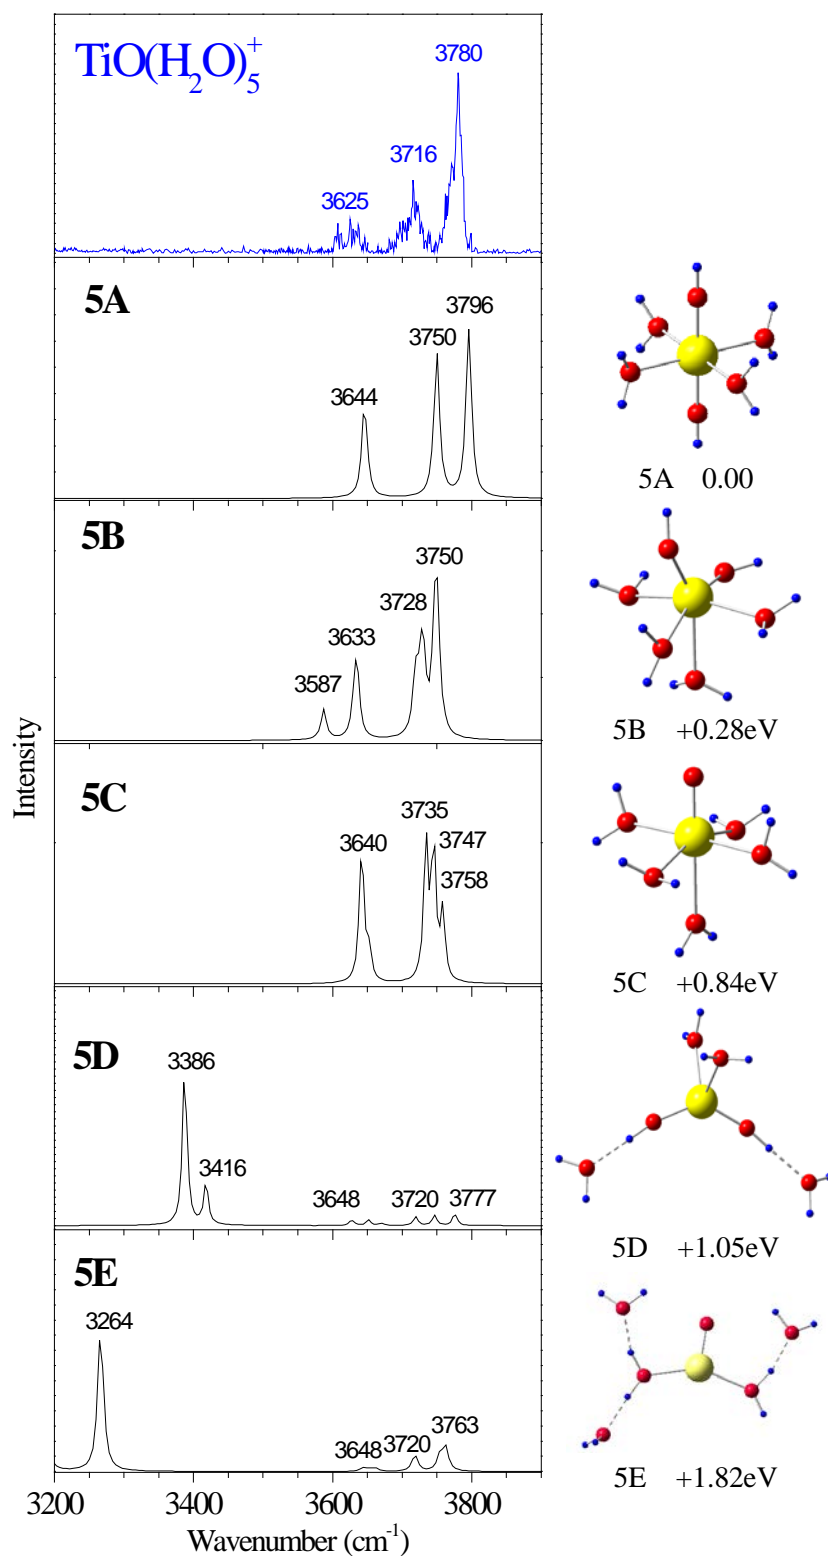

**Figure S3.** IRPD spectrum of  $\text{TiO}(\text{H}_2\text{O})_5^+$  cluster and the simulated theoretical IR spectra of its low-lying isomers obtained at MP2/6-311G+(d, p) level.. The theoretical IR spectra were produced by using Lorentzian components with a full width at half-maximum of  $10 \text{ cm}^{-1}$ .

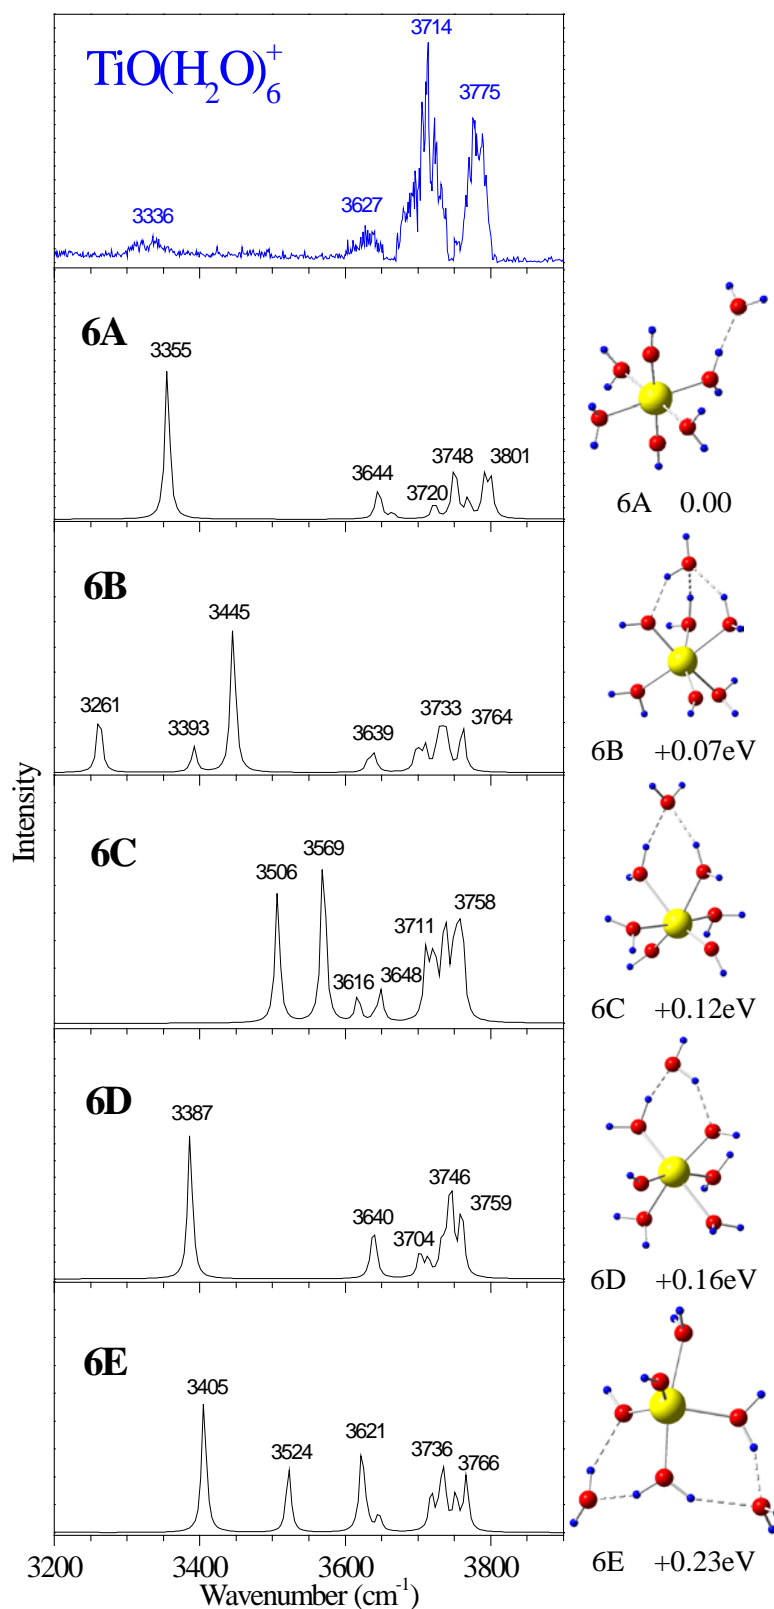

**Figure S4.** IRPD spectrum of  $\text{TiO}(\text{H}_2\text{O})_6^+$  cluster and the simulated theoretical IR spectra of its low-lying isomers obtained at MP2/6-311G+(d, p) level. The theoretical IR spectra were produced by using Lorentzian components with a full width at half-maximum of  $10 \text{ cm}^{-1}$ .

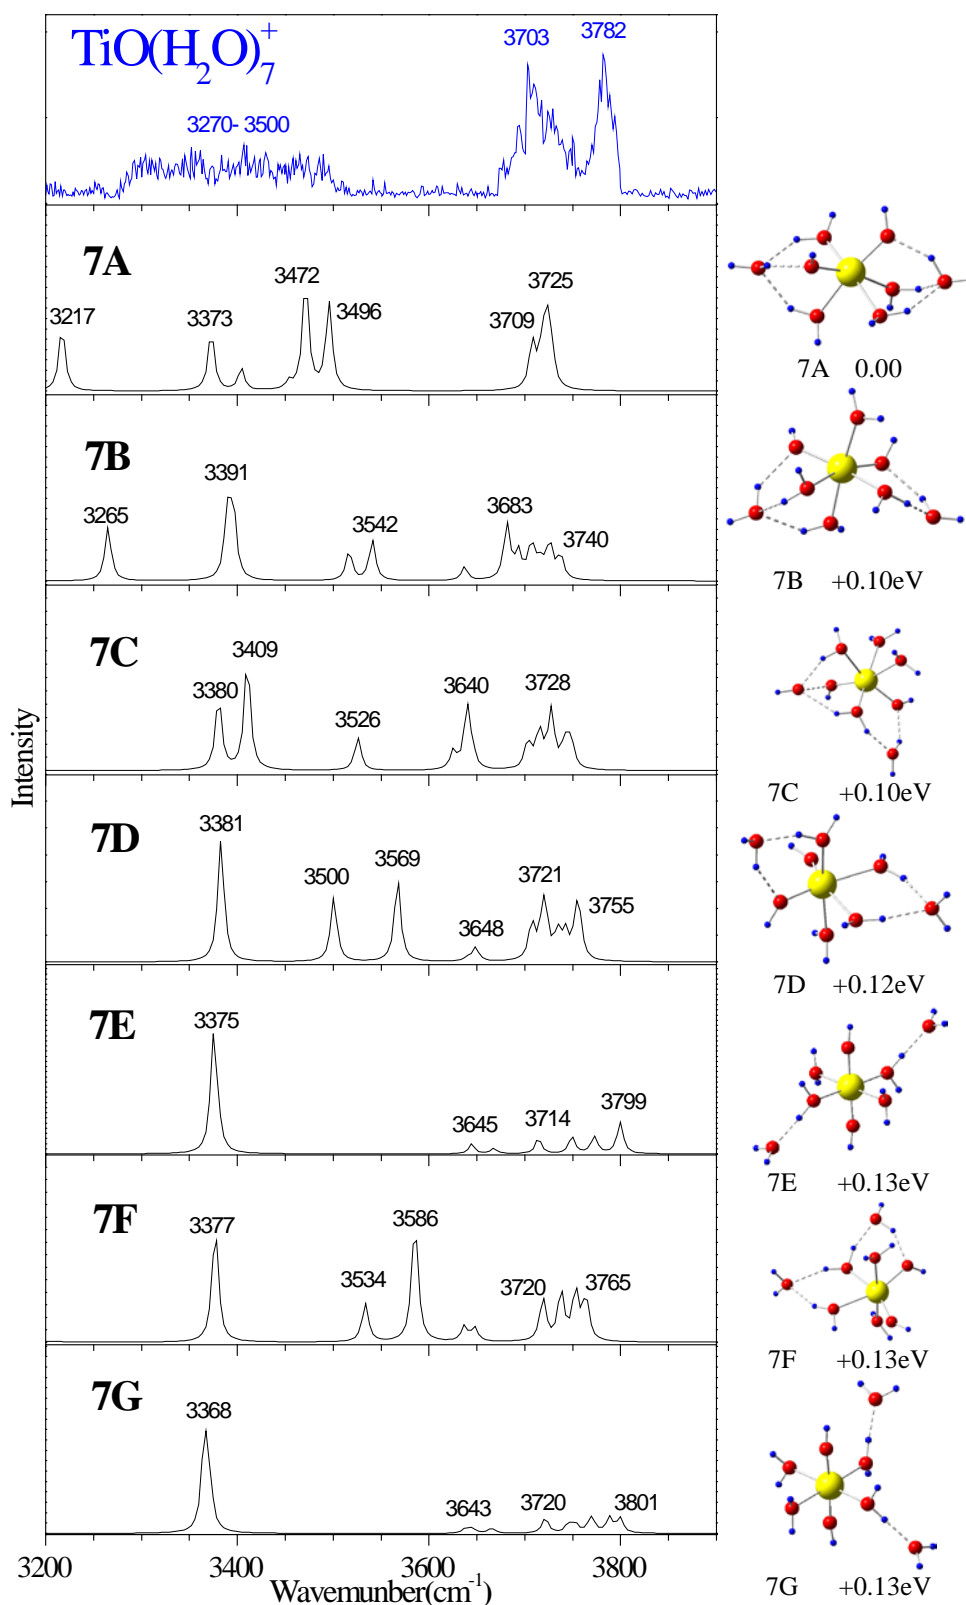

**Figure S5.** IRPD spectrum of  $\text{TiO}(\text{H}_2\text{O})_7^+$  cluster and the simulated theoretical IR spectra of its low-lying isomers obtained at MP2/6-311G+(d, p) level. The theoretical IR spectra were produced by using Lorentzian components with a full width at half-maximum of  $10 \text{ cm}^{-1}$ .

**Table S1.** Cartesian coordinates for stable isomers of  $\text{TiO}(\text{H}_2\text{O})_n^+$  clusters obtained at B3LPY/6-311G+(d, p) level

| <b><math>\text{TiO}(\text{H}_2\text{O})^+</math></b> |             |             |             |    |             |             |            |  |
|------------------------------------------------------|-------------|-------------|-------------|----|-------------|-------------|------------|--|
|                                                      | <b>A</b>    |             |             |    | <b>B</b>    |             |            |  |
|                                                      | X           | Y           | Z           |    | X           | Y           | Z          |  |
| Ti                                                   | -0.00070600 | -0.29867500 | 0.00000000  | Ti | 0.00000000  | 0.54056600  | 0.00000000 |  |
| O                                                    | -0.00070600 | 0.31085300  | 1.64935700  | O  | -1.18577600 | -1.24070100 | 0.00000000 |  |
| O                                                    | -0.00070600 | 0.31085300  | -1.64935700 | O  | 1.54519000  | 0.19410200  | 0.00000000 |  |
| H                                                    | 0.01341500  | 0.79859800  | 2.48281800  | H  | -0.73721400 | -2.10143600 | 0.00000000 |  |
| H                                                    | 0.01341500  | 0.79859800  | -2.48281800 | H  | -2.13810300 | -1.41822300 | 0.00000000 |  |

  

| <b><math>\text{TiO}(\text{H}_2\text{O})\text{Ar}^+</math></b> |             |             |             |    |             |             |             |  |
|---------------------------------------------------------------|-------------|-------------|-------------|----|-------------|-------------|-------------|--|
|                                                               | <b>1A</b>   |             |             |    | <b>1B</b>   |             |             |  |
|                                                               | X           | Y           | Z           |    | X           | Y           | Z           |  |
| Ti                                                            | 0.18898000  | 0.61751700  | 0.00000000  | Ti | 0.45272100  | 0.12711300  | -0.16550400 |  |
| O                                                             | -0.10357800 | 1.21141500  | 1.63080000  | O  | 2.26415100  | -0.97141300 | 0.11815100  |  |
| O                                                             | -0.10357800 | 1.21141500  | -1.63080000 | O  | 0.72553700  | 1.65931100  | 0.14415600  |  |
| H                                                             | -0.31795600 | 1.68753700  | 2.44211400  | H  | 3.05188800  | -0.48931400 | 0.41540600  |  |
| H                                                             | -0.31795600 | 1.68753700  | -2.44211400 | H  | 2.53037300  | -1.89098200 | -0.02648800 |  |
| Ar                                                            | -0.10357800 | -2.01906100 | 0.00000000  | Ar | -2.19220200 | -0.32885400 | 0.06409500  |  |

  

| <b><math>\text{TiO}(\text{H}_2\text{O})_5^+</math></b> |             |             |             |    |             |             |             |  |
|--------------------------------------------------------|-------------|-------------|-------------|----|-------------|-------------|-------------|--|
|                                                        | <b>5A</b>   |             |             |    | <b>5B</b>   |             |             |  |
|                                                        | X           | Y           | Z           |    | X           | Y           | Z           |  |
| Ti                                                     | -0.00002800 | -0.00036800 | 0.00016600  | Ti | -0.06926100 | 0.12982600  | -0.22452400 |  |
| O                                                      | -1.61067500 | -1.53397500 | 0.00521400  | O  | -0.08343800 | -1.56675700 | 1.30684400  |  |
| H                                                      | -1.73002300 | -2.08831700 | -0.77545000 | H  | -0.94417300 | -1.67480800 | 1.73333800  |  |
| H                                                      | -1.73235800 | -2.09117600 | 0.78340700  | H  | 0.21231800  | -2.45099500 | 1.05541000  |  |
| O                                                      | -0.00871900 | -0.00160500 | -1.84151700 | O  | -1.31159100 | -0.75516100 | -1.30576700 |  |
| H                                                      | -0.00689600 | -0.00198600 | -2.79855000 | H  | -1.32589700 | -1.30018500 | -2.09625000 |  |
| O                                                      | 1.53621700  | -1.60847800 | -0.00561300 | O  | 1.65703500  | -0.92390900 | -1.04234500 |  |
| H                                                      | 2.08808000  | -1.73312200 | 0.77592900  | H  | 2.52463100  | -0.69398700 | -0.68383700 |  |
| H                                                      | 2.09572500  | -1.72524100 | -0.78289200 | H  | 1.77151800  | -1.14069800 | -1.97612200 |  |
| O                                                      | -1.53506600 | 1.60919800  | 0.00482700  | O  | -2.00113900 | 0.51584900  | 0.80764800  |  |
| H                                                      | -2.09021000 | 1.72824100  | 0.78491900  | H  | -2.30210100 | 1.35714700  | 1.17182500  |  |
| H                                                      | -2.09225100 | 1.72679700  | -0.77405900 | H  | -2.62868800 | 0.23381800  | 0.12058700  |  |
| O                                                      | 1.60842700  | 1.53601200  | -0.00684200 | O  | 0.31500500  | 1.85250400  | -0.69241500 |  |
| H                                                      | 1.71895200  | 2.10204000  | -0.78029700 | H  | 0.10499600  | 2.49785900  | -1.37235100 |  |
| O                                                      | 0.01045400  | 0.00009600  | 1.84215000  | O  | 1.52489700  | 0.66944700  | 1.35055600  |  |
| H                                                      | 0.01101900  | -0.00168700 | 2.79918800  | H  | 1.57888800  | 0.36525200  | 2.26404700  |  |
| H                                                      | 1.73347300  | 2.08256600  | 0.77840700  | H  | 1.72610600  | 1.61465000  | 1.32672300  |  |

  

|    | <b>5C</b>   |             |             |    | <b>5D</b>   |             |             |  |
|----|-------------|-------------|-------------|----|-------------|-------------|-------------|--|
|    | X           | Y           | Z           |    | X           | Y           | Z           |  |
| Ti | -0.00001000 | 0.33854100  | -0.10258100 | Ti | -0.00003900 | 0.00034900  | -0.25295800 |  |
| O  | -1.62592000 | -0.37997300 | -0.09197100 | O  | -0.00029800 | 0.00148300  | -1.89763300 |  |
| H  | -2.42707600 | -0.94490400 | -0.06434600 | O  | -1.90602600 | 1.23498100  | -0.20519900 |  |
| O  | 1.62607500  | -0.37956400 | -0.09033400 | H  | -2.21041200 | 1.97958000  | 0.32637200  |  |
| H  | 2.42716200  | -0.94462500 | -0.06341100 | H  | -2.07283400 | 1.44894500  | -1.13408000 |  |
| O  | -0.00030600 | 1.76945800  | 1.57516700  | O  | 1.90607400  | -1.23426500 | -0.20767200 |  |
| H  | 0.77696200  | 1.80691400  | 2.14923800  | H  | 2.21056500  | -1.97980600 | 0.32251600  |  |
| H  | -0.77729600 | 1.80654500  | 2.14963400  | H  | 2.07252500  | -1.44668400 | -1.13697500 |  |
| O  | 3.86766800  | -1.91769500 | 0.02319500  | O  | 1.48820800  | 1.61611900  | 0.21847700  |  |
| H  | 3.89720900  | -2.85346500 | 0.24854400  | H  | 2.40441100  | 1.31642200  | 0.14263400  |  |
| H  | 4.70196200  | -1.71472500 | -0.41276000 | H  | 1.43530500  | 2.44106100  | -0.28014600 |  |
| O  | -3.86728400 | -1.91820400 | 0.02365500  | O  | -1.48805700 | -1.61652500 | 0.21584200  |  |
| H  | -3.89518000 | -2.85640200 | 0.23898200  | H  | -2.40430900 | -1.31673400 | 0.14095300  |  |
| H  | -4.70498600 | -1.71040500 | -0.40344300 | H  | -1.43516900 | -2.44005300 | -0.28512300 |  |
| O  | -0.00002100 | 2.15994100  | -1.25219300 | O  | 0.00014100  | -0.00230500 | 2.13356000  |  |
| H  | 0.00001800  | 2.24358400  | -2.21355300 | H  | 0.47590100  | 0.61124100  | 2.70581700  |  |
| H  | -0.00025900 | 3.04788600  | -0.87225400 | H  | -0.47546900 | -0.61755000 | 2.70411900  |  |

  

|    | <b>5E</b>   |             |             |
|----|-------------|-------------|-------------|
|    | X           | Y           | Z           |
| Ti | 0.43974700  | -0.14507400 | -0.05797100 |
| O  | 1.14998600  | 1.31020000  | -0.04914600 |
| O  | -1.60253400 | -0.02203900 | -0.01858700 |
| H  | -2.28391900 | -0.74295300 | 0.00975100  |
| H  | -2.06476400 | 0.86362800  | -0.00292200 |
| O  | -3.30376300 | -2.05968000 | 0.05672700  |
| H  | -3.78740400 | -2.33008300 | 0.84592300  |

|   |             |             |             |
|---|-------------|-------------|-------------|
| H | -3.82009200 | -2.36520000 | -0.69816000 |
| O | 2.06349600  | -1.43263600 | -0.03652600 |
| H | 2.26050500  | -2.37333300 | 0.02769200  |
| H | 2.91880400  | -0.88313600 | 0.01045600  |
| O | 3.86998000  | 0.34842800  | 0.16049400  |
| H | 3.32069100  | 1.14570400  | 0.08739500  |
| H | 4.72691300  | 0.52942300  | -0.23962900 |
| O | -2.82919200 | 2.30436100  | 0.03601600  |
| H | -2.76726200 | 2.90462600  | 0.78797500  |
| H | -2.96167800 | 2.85388400  | -0.74492700 |

**TiO(H<sub>2</sub>O)<sub>6</sub><sup>+</sup>**

| <b>6A</b> |             |             |             | <b>6B</b> |             |             |             |
|-----------|-------------|-------------|-------------|-----------|-------------|-------------|-------------|
| Ti        | -0.48129200 | 0.00454600  | 0.03779500  | Ti        | 0.63026100  | -0.01357300 | 0.16200400  |
| O         | -0.87410300 | 2.18564600  | -0.19335600 | O         | 2.59036000  | -0.77354800 | -0.66329800 |
| H         | -0.92698100 | 2.72160000  | 0.60706900  | H         | 3.22023200  | -0.97934900 | 0.04057300  |
| H         | -0.34736600 | 2.67285100  | -0.83820700 | H         | 3.09336200  | -0.43140600 | -1.41239000 |
| O         | -1.21335100 | 0.06272000  | 1.73369000  | O         | 0.75950700  | 1.54909800  | -0.89542500 |
| H         | -1.58730100 | 0.08901200  | 2.61375500  | H         | 1.53525700  | 1.95869700  | -1.28976300 |
| O         | 1.49350900  | 0.45146000  | 0.86249100  | O         | -1.44969700 | 2.96633200  | -0.07954500 |
| H         | 2.35043000  | 0.24840300  | 0.42339400  | H         | -1.98835000 | 3.63421300  | -0.51360900 |
| H         | 1.61027000  | 0.32331300  | 1.80986600  | H         | -0.63635400 | 2.82100300  | -0.60038600 |
| O         | -2.51248900 | -0.43778800 | -0.79352100 | O         | -1.37861600 | 0.47772200  | 0.55365600  |
| H         | -2.65272100 | -0.23731400 | -1.72687400 | H         | -2.12961700 | -0.12534800 | 0.45536400  |
| H         | -3.29396300 | -0.14745700 | -0.30833000 | H         | -1.65367400 | 1.42542200  | 0.39101600  |
| O         | -0.15070900 | -2.18670000 | 0.25473800  | O         | 1.28880200  | -0.34272100 | 1.80840600  |
| H         | -0.68312500 | -2.65446900 | 0.90935900  | H         | 1.47002800  | -0.13206400 | 2.72653500  |
| O         | 0.16089300  | -0.06180900 | -1.68844100 | O         | -2.82635600 | -1.96088200 | -0.15353000 |
| H         | 0.63303500  | -0.08755100 | -2.51998400 | H         | -3.51469100 | -1.96558800 | -0.83158400 |
| H         | -0.14154000 | -2.71931300 | -0.54950400 | H         | -3.14396800 | -2.54447500 | 0.54826800  |
| O         | 3.92873300  | -0.02477100 | -0.23999500 | O         | -0.15627200 | -1.77034600 | -0.73564100 |
| H         | 4.60290800  | 0.65320400  | -0.35860800 | H         | 0.35797900  | -2.49478000 | -1.10958300 |
| H         | 4.36491000  | -0.87234300 | -0.37826500 | H         | -1.09778600 | -2.03295700 | -0.64550100 |
| <b>6C</b> |             |             |             | <b>6D</b> |             |             |             |
| Ti        | -0.41047900 | 0.10120300  | -0.27662000 | Ti        | -0.69620200 | 0.01527300  | 0.04776500  |
| O         | -1.63026500 | 0.44878100  | 1.61143800  | O         | -1.68957000 | -0.33620000 | -1.50086600 |
| H         | -1.15061000 | 0.48338400  | 2.44908100  | H         | -2.18239800 | 0.19220400  | -2.13351500 |
| H         | -2.19456700 | 1.23123900  | 1.56154800  | O         | -0.59836000 | 2.21386300  | -0.22882200 |
| O         | -1.55212300 | 1.29407000  | -1.02581200 | H         | -0.17727000 | 2.65083000  | -0.97743700 |
| H         | -2.02548400 | 1.65111900  | -1.78010700 | H         | -1.27677100 | 2.80041400  | 0.12539400  |
| O         | -1.66814300 | -1.69800600 | -0.33235900 | O         | -0.68595700 | -2.19250300 | 0.00911500  |
| H         | -2.48001200 | -1.71069800 | 0.19083400  | H         | -0.76452600 | -2.75419500 | 0.78876800  |
| H         | -1.79889100 | -2.27616700 | -1.09431700 | H         | -1.38817900 | -2.42988400 | -0.61564600 |
| O         | 1.04298300  | 1.67536900  | 0.22377900  | O         | -1.57615600 | 0.21818600  | 1.64313300  |
| H         | 1.96985200  | 1.35489300  | 0.21263000  | H         | -2.43546800 | 0.19520500  | 2.06893800  |
| H         | 0.99870900  | 2.48939400  | -0.29185800 | O         | 3.54788400  | -0.11836200 | -0.02768800 |
| O         | 0.89989600  | -0.68723800 | -1.42978900 | H         | 4.03950000  | -0.94878800 | 0.01680600  |
| H         | 0.79196700  | -1.22980600 | -2.21560100 | H         | 4.21441500  | 0.57594200  | -0.10951700 |
| O         | 2.97903300  | -0.18773100 | 0.12470500  | O         | 1.11038000  | 0.01355700  | 1.41406900  |
| H         | 3.92749100  | -0.33452900 | 0.04622900  | H         | 2.06185500  | 0.05957200  | 1.22822700  |
| H         | 2.52219200  | -0.50861600 | -0.69032600 | H         | 0.93351000  | 0.28688600  | 2.32117900  |
| O         | 0.70850600  | -0.93021900 | 1.43212400  | O         | 1.06598100  | 0.12246000  | -1.36440600 |
| H         | 0.55908600  | -1.86920100 | 1.59612000  | H         | 1.99644000  | -0.02088100 | -1.11012600 |
| H         | 1.67172600  | -0.82768700 | 1.26871700  | H         | 0.90170000  | -0.31132500 | -2.21017700 |
| <b>6E</b> |             |             |             |           |             |             |             |
| Ti        | 0.28222400  | 0.05639700  | -0.21579600 |           |             |             |             |
| O         | 0.55301600  | -0.89797600 | 1.81793900  |           |             |             |             |
| H         | 0.91300000  | -0.45333000 | 2.59489300  |           |             |             |             |
| H         | -0.18289400 | -1.45915500 | 2.09383300  |           |             |             |             |
| O         | -1.02241100 | -1.34747200 | -0.38768600 |           |             |             |             |
| H         | -0.84978100 | -2.19985700 | -0.80046600 |           |             |             |             |
| O         | 2.07222100  | -1.24457700 | -0.61625500 |           |             |             |             |
| H         | 2.28916800  | -2.04924800 | -0.13005000 |           |             |             |             |
| H         | 2.35727100  | -1.36058900 | -1.53125600 |           |             |             |             |
| O         | -1.30383300 | 1.29153100  | 0.53762200  |           |             |             |             |
| H         | -2.21844300 | 0.88893500  | 0.39255300  |           |             |             |             |
| H         | -1.36639400 | 2.23230800  | 0.34017000  |           |             |             |             |
| O         | 0.60899300  | 0.92003600  | -1.77241500 |           |             |             |             |
| H         | 0.31022200  | 1.11800600  | -2.66290200 |           |             |             |             |



|   |             |             |             |
|---|-------------|-------------|-------------|
| O | -3.36614300 | -0.08233900 | -0.09794800 |
| H | -2.76537400 | -0.83557500 | -0.28874600 |
| H | -4.15433800 | -0.40874900 | 0.34657300  |
| O | 1.83734200  | 1.33077300  | 0.87292300  |
| H | 2.72443200  | 1.25955000  | 0.49649300  |
| H | 1.70072000  | 2.26716300  | 1.06296500  |

**TiO(H<sub>2</sub>O)<sub>7</sub><sup>+</sup>**

| <b>7A</b> |             |             |             | <b>7B</b> |             |             |             |
|-----------|-------------|-------------|-------------|-----------|-------------|-------------|-------------|
| Ti        | 0.02169600  | 0.03490600  | -0.17559500 | Ti        | 0.01034600  | -0.54440700 | 0.00162100  |
| O         | -1.20238200 | 0.53104000  | 1.59201800  | O         | -1.61990400 | 0.56204800  | -0.96000900 |
| H         | -1.03656800 | 0.31307900  | 2.51543400  | H         | -2.25387400 | 1.14987300  | -0.49285700 |
| H         | -2.16561700 | 0.52193400  | 1.41503500  | H         | -1.38265300 | 0.98948000  | -1.78992700 |
| O         | -1.26013600 | 1.04611200  | -1.18497600 | O         | -0.88144600 | -0.64367100 | 1.62033700  |
| H         | -1.08256000 | 1.81794300  | -1.73184400 | H         | -1.44968200 | -0.58675400 | 2.38727800  |
| O         | -3.36460200 | 0.08450700  | 0.01965400  | O         | 0.98395200  | 1.31107200  | 0.63835400  |
| H         | -4.30871500 | 0.21889800  | -0.11308500 | H         | 1.85269200  | 1.61914300  | 0.29723400  |
| H         | -2.85696800 | 0.62846800  | -0.63658000 | H         | 0.96808600  | 1.47755300  | 1.58678100  |
| O         | 1.32695500  | 1.66025500  | 0.33089100  | O         | -0.96430900 | -2.46777800 | -0.61594500 |
| H         | 2.28001000  | 1.44585700  | 0.26257200  | H         | -1.00606600 | -2.62088100 | -1.56773300 |
| H         | 1.19014800  | 2.61332400  | 0.31381600  | H         | -1.83386800 | -2.66594700 | -0.24856000 |
| O         | 1.16397100  | -0.66348400 | -1.49245700 | O         | 1.64307500  | -1.75083800 | 0.95122600  |
| H         | 0.99717000  | -0.76172900 | -2.43513100 | H         | 1.36426900  | -2.22293000 | 1.74551900  |
| O         | 3.36932900  | -0.06013700 | -0.04756100 | O         | 0.91751400  | -0.58067400 | -1.60915400 |
| H         | 4.31796300  | -0.14709400 | -0.19113500 | H         | 1.47999700  | -0.46902000 | -2.37431000 |
| H         | 2.89485100  | -0.40281000 | -0.83700100 | H         | 2.12434000  | -2.37455500 | 0.39477900  |
| O         | 1.24943600  | -0.97839500 | 1.39441200  | O         | 3.37947500  | 2.29601700  | -0.20921200 |
| H         | 1.09952000  | -1.88962600 | 1.67127800  | H         | 4.25300300  | 1.90221200  | -0.11291300 |
| H         | 2.20384000  | -0.87247300 | 1.20490600  | H         | 3.51591900  | 3.19153300  | -0.53668000 |
| O         | -1.34229500 | -1.68010100 | -0.18365700 | O         | -3.47089000 | 2.20453100  | 0.18042000  |
| H         | -1.25460200 | -2.39615300 | -0.82286200 | H         | -4.41941900 | 2.11944100  | 0.03559700  |
| H         | -2.27799300 | -1.37593600 | -0.17891500 | H         | -3.34007900 | 3.02214900  | 0.67199400  |
| <b>7C</b> |             |             |             | <b>7D</b> |             |             |             |
| Ti        | -0.24769700 | 0.42995200  | 0.10033800  | Ti        | 0.10169200  | -0.38411100 | -0.20130700 |
| O         | -3.41074200 | -1.34774500 | -0.09860700 | O         | -3.25637000 | 1.09191600  | 0.01431400  |
| H         | -3.03988600 | -0.72342100 | -0.76115900 | H         | -3.94929400 | 1.51563200  | -0.50070700 |
| H         | -3.98549300 | -1.97368000 | -0.54907100 | H         | -3.01045800 | 0.24711400  | -0.41681800 |
| O         | -1.61140200 | 0.28581000  | -1.24381500 | O         | -1.65212300 | -0.98588400 | -0.66052300 |
| H         | -1.72597500 | 0.89783100  | -1.97774100 | H         | -1.86687200 | -1.83335700 | -1.06398600 |
| O         | 0.76529900  | 2.17816400  | -0.89555500 | O         | 1.09586600  | -2.34565800 | -0.65279800 |
| H         | 1.02210700  | 2.27815300  | -1.81880100 | H         | 0.92843800  | -3.16943500 | -0.17954700 |
| H         | 0.51755100  | 3.04524700  | -0.55227500 | H         | 1.45309800  | -2.56479300 | -1.52163900 |
| O         | -1.03808500 | -1.38340000 | 0.87809300  | O         | -0.76487200 | 1.36241100  | 0.61875900  |
| H         | -0.83975200 | -1.71755500 | 1.75858000  | H         | -0.24779900 | 2.18220600  | 0.60420700  |
| H         | -1.99556400 | -1.57160100 | 0.64183300  | H         | -1.72949400 | 1.53049300  | 0.41988800  |
| O         | -0.62814900 | 1.59561300  | 1.45869400  | O         | 0.95990900  | 0.43726400  | -1.63686300 |
| H         | -1.38658300 | 1.99664000  | 1.89013400  | H         | 0.66573200  | 0.53300700  | -2.54840800 |
| O         | 3.53338500  | -1.40653400 | -0.18310500 | O         | 1.72868600  | 2.58118100  | 0.00992600  |
| H         | 3.74684500  | -2.30617200 | 0.09708200  | H         | 2.22119700  | 3.40462000  | -0.07899700 |
| H         | 4.35296900  | -1.04401000 | -0.54362600 | H         | 1.67466000  | 2.15697400  | -0.86738800 |
| O         | 1.58393000  | -0.03313600 | 1.36654800  | O         | 1.88022200  | 0.11838200  | 1.08376500  |
| H         | 2.44806500  | -0.36577900 | 1.07356500  | H         | 2.70953700  | -0.36082800 | 0.96902400  |
| H         | 1.70985000  | 0.60937500  | 2.07487300  | H         | 2.08047600  | 1.07233300  | 0.95530200  |
| O         | 1.06751300  | -0.67247600 | -1.33912400 | O         | -0.26185100 | -1.45594700 | 1.74379600  |
| H         | 1.92694200  | -1.07691800 | -1.11718300 | H         | 0.19116000  | -1.11350200 | 2.52556700  |
| H         | 0.60426600  | -1.23742600 | -1.96866700 | H         | -1.19334600 | -1.57934400 | 1.96924600  |
| <b>7E</b> |             |             |             | <b>7F</b> |             |             |             |
| Ti        | -0.49904600 | -0.57990800 | -0.02480700 | Ti        | -0.03149600 | 0.30877000  | -0.27306800 |
| O         | -1.06381200 | 3.02525100  | 0.08097400  | O         | 3.17450900  | -1.33915300 | 0.26846300  |
| H         | -1.41495800 | 3.82662200  | 0.48068900  | H         | 4.12600800  | -1.46775200 | 0.20684500  |
| H         | -1.72955500 | 2.30996900  | 0.17290700  | H         | 2.83245200  | -1.06397600 | -0.60481500 |
| O         | -2.05946200 | 0.50246600  | 0.31723800  | O         | 1.42742900  | -0.07969000 | -1.43364700 |
| H         | -2.66211800 | 0.37166100  | 1.05593700  | H         | 1.85315500  | 0.54703100  | -2.02799300 |
| O         | -0.06083600 | -1.04942800 | 2.10829700  | O         | 0.45658900  | 2.45320100  | 0.04347300  |
| H         | 0.09796500  | -0.35159600 | 2.75432200  | H         | 1.23994900  | 2.66524100  | 0.56687100  |
| H         | -0.45506400 | -1.80475400 | 2.55947800  | H         | 0.27133200  | 3.19426600  | -0.54513000 |
| O         | -0.84370700 | 0.20627300  | -2.00888100 | O         | -0.38892800 | -1.81918500 | -0.19734100 |
| H         | -0.49570000 | -0.08541300 | -2.85835200 | H         | -1.32733200 | -2.06776200 | -0.08865300 |
| H         | -1.73348100 | 0.56459900  | -2.13076400 | H         | 0.01628600  | -2.37947300 | -0.87124000 |

|   |             |             |             |   |             |             |             |
|---|-------------|-------------|-------------|---|-------------|-------------|-------------|
| O | -0.89327000 | -2.33503000 | -0.32993200 | O | -1.60322900 | 0.66109200  | -1.23234300 |
| H | -1.58973200 | -2.96965400 | -0.50974200 | H | -1.71096100 | 0.83568700  | -2.17283300 |
| O | 3.49079600  | 0.77173300  | -0.09773700 | O | -3.02973500 | -1.20497200 | 0.20485800  |
| H | 3.92388700  | 1.20351300  | -0.84529500 | H | -3.92883200 | -1.55187400 | 0.20660300  |
| H | 4.14132900  | 0.77171800  | 0.61586500  | H | -2.95010400 | -0.53562700 | -0.50504700 |
| O | 1.58058900  | -1.21724400 | -0.66896500 | O | -1.33440700 | 0.43360600  | 1.58868000  |
| H | 2.42420700  | -0.77113100 | -0.48048200 | H | -1.66281800 | 1.29065400  | 1.88615000  |
| H | 1.71305400  | -2.17210500 | -0.67926300 | H | -2.11725200 | -0.14099800 | 1.46379500  |
| O | 0.70969300  | 1.16534700  | 0.55182700  | O | 1.39753700  | 0.18728100  | 1.39156200  |
| H | 1.65088400  | 1.27982700  | 0.34230600  | H | 1.05369800  | -0.08848700 | 2.24962400  |
| H | 0.22838200  | 2.02978300  | 0.44558200  | H | 2.19922300  | -0.36730900 | 1.17367100  |

**7G**

|    |             |             |             |
|----|-------------|-------------|-------------|
| Ti | 0.00374800  | 0.00397600  | 0.00059800  |
| O  | -0.40338400 | 2.18266300  | -0.25784700 |
| H  | -0.33399400 | 2.73351100  | 0.53028900  |
| H  | 0.11529700  | 2.60737900  | -0.95335300 |
| O  | -0.69857100 | 0.05332100  | 1.71228100  |
| H  | -1.20727600 | 0.09435900  | 2.52215400  |
| O  | 1.95044700  | 0.53445700  | 0.87338900  |
| H  | 2.82035500  | 0.30868200  | 0.47270800  |
| H  | 2.01606000  | 0.39114100  | 1.82310000  |
| O  | -1.94593800 | -0.52333000 | -0.86926500 |
| H  | -2.00778800 | -0.38191400 | -1.82072300 |
| H  | -2.81860900 | -0.30355200 | -0.47482800 |
| O  | 0.41389900  | -2.17495500 | 0.26327700  |
| H  | -0.10228000 | -2.59936400 | 0.95845600  |
| O  | 0.70123700  | -0.04734500 | -1.69874100 |
| H  | 1.23607100  | -0.08798000 | -2.51677700 |
| H  | 0.34265000  | -2.72636100 | -0.52638900 |
| O  | 4.40389400  | -0.03248800 | -0.14362100 |
| H  | 4.79387400  | -0.90979700 | -0.21665200 |
| H  | 5.13407400  | 0.59568400  | -0.16881100 |
| O  | -4.43300500 | 0.00417100  | 0.11160100  |
| H  | -4.83647600 | 0.86394700  | 0.27139600  |
| H  | -5.14304200 | -0.64516800 | 0.15768200  |

**Table S2.** Cartesian coordinates for stable isomers of  $\text{TiO}(\text{H}_2\text{O})_n^+$  clusters obtained at MP2/6-311G+(d, p) level

| <b><math>\text{TiO}(\text{H}_2\text{O})\text{Ar}^+</math></b> |             |             |             |           |             |             |             |  |  |
|---------------------------------------------------------------|-------------|-------------|-------------|-----------|-------------|-------------|-------------|--|--|
| <b>1A</b>                                                     |             |             |             | <b>1B</b> |             |             |             |  |  |
| O                                                             | -0.00029700 | 1.22309900  | 1.66276600  | O         | -1.67657700 | 1.40733300  | 0.17870800  |  |  |
| H                                                             | -0.00081500 | 1.70589900  | 2.49656600  | H         | -2.42249500 | 1.28900100  | 0.78259900  |  |  |
| O                                                             | -0.00029700 | 1.22309900  | -1.66276600 | H         | -1.49739200 | 2.35562600  | 0.16821000  |  |  |
| H                                                             | -0.00081500 | 1.70589900  | -2.49656600 | Ti        | -0.52980300 | -0.34797900 | -0.40237600 |  |  |
| Ti                                                            | 0.00053300  | 0.62998200  | 0.00000000  | O         | -0.88775200 | -1.55568300 | 0.56698900  |  |  |
| Ar                                                            | -0.00029700 | -2.04672200 | 0.00000000  | Ar        | 2.00501000  | 0.28876200  | 0.10754900  |  |  |

  

| <b><math>\text{TiO}(\text{H}_2\text{O})_5^+</math></b> |             |             |             |           |             |             |             |  |  |
|--------------------------------------------------------|-------------|-------------|-------------|-----------|-------------|-------------|-------------|--|--|
| <b>5A</b>                                              |             |             |             | <b>5B</b> |             |             |             |  |  |
| Ti                                                     | 0.00015000  | -0.00007200 | -0.00000700 | Ti        | -0.06196600 | 0.05692600  | -0.25710200 |  |  |
| O                                                      | -1.62331600 | -1.50647200 | 0.00458700  | O         | -0.06092800 | -1.13775000 | 1.68540800  |  |  |
| H                                                      | -1.75834700 | -2.06490000 | -0.76869200 | H         | -0.93943100 | -1.26895100 | 2.06296400  |  |  |
| H                                                      | -1.75501000 | -2.06803900 | 0.77613800  | H         | 0.35212500  | -2.00903900 | 1.69956400  |  |  |
| O                                                      | -0.00663200 | -0.00139400 | -1.84359400 | O         | -1.23176300 | -1.17198600 | -1.05476800 |  |  |
| H                                                      | -0.00406500 | -0.00161100 | -2.79965000 | H         | -1.19993000 | -1.93327000 | -1.63647600 |  |  |
| O                                                      | 1.50689600  | -1.62311300 | -0.00282700 | O         | 1.72526700  | -1.13536800 | -0.66962200 |  |  |
| H                                                      | 2.06798400  | -1.75579200 | 0.76892600  | H         | 2.59214100  | -0.75011400 | -0.49372500 |  |  |
| H                                                      | 2.06582800  | -1.75711400 | -0.77590000 | H         | 1.81872200  | -1.64764400 | -1.48109300 |  |  |
| O                                                      | -1.50659800 | 1.62302400  | 0.00229400  | O         | -2.00882900 | 0.68385700  | 0.57208600  |  |  |
| H                                                      | -2.06452600 | 1.75831100  | 0.77586800  | H         | -2.32616400 | 1.58594400  | 0.68953400  |  |  |
| H                                                      | -2.06886400 | 1.75367100  | -0.76895300 | H         | -2.64621000 | 0.22985300  | 0.00041700  |  |  |
| O                                                      | 1.62288500  | 1.50694900  | -0.00433500 | O         | 0.32195700  | 1.55585200  | -1.22866000 |  |  |
| H                                                      | 1.75308700  | 2.06983500  | -0.77518400 | O         | 0.13276500  | 1.96107100  | -2.07748800 |  |  |
| O                                                      | 0.00641600  | 0.00134000  | 1.84366000  | O         | 1.33953500  | 1.13506900  | 1.17608600  |  |  |
| H                                                      | 0.00480600  | 0.00029200  | 2.79971700  | H         | 1.35815600  | 1.10162300  | 2.13803000  |  |  |
| H                                                      | 1.75860100  | 2.06427300  | 0.76961900  | H         | 1.53916000  | 2.04076300  | 0.91028100  |  |  |

  

| <b>5C</b> |             |             |             |    |             |             |             |  |  |
|-----------|-------------|-------------|-------------|----|-------------|-------------|-------------|--|--|
| Ti        | 0.00001700  | 0.29593500  | -0.11367200 | Ti | 0.00000800  | 0.00003600  | 0.30107600  |  |  |
| O         | -1.65308100 | -0.37405200 | -0.11123500 | O  | 0.00009300  | 0.00010500  | 1.94694800  |  |  |
| H         | -2.47061300 | -0.90813000 | -0.08961600 | O  | 1.90295900  | 1.22096200  | 0.11000100  |  |  |
| O         | 1.65313100  | -0.37400500 | -0.10959300 | H  | 2.16412100  | 1.91204700  | -0.50682900 |  |  |
| H         | 2.47061200  | -0.90817900 | -0.08841200 | H  | 2.19212000  | 1.51653800  | 0.98162800  |  |  |
| O         | -0.00067100 | 1.63460700  | 1.62931700  | O  | -1.90297300 | -1.22088100 | 0.11030500  |  |  |
| H         | 0.76969200  | 1.65420700  | 2.21053500  | H  | -2.16418000 | -1.91199400 | -0.50647400 |  |  |
| H         | -0.77150500 | 1.65441500  | 2.20990100  | H  | -2.19206200 | -1.51641800 | 0.98196900  |  |  |
| O         | 3.96599000  | -1.80552200 | 0.02730600  | O  | -1.39284000 | 1.70654700  | -0.18972200 |  |  |
| H         | 4.01489300  | -2.75664900 | 0.15872200  | H  | -2.33123800 | 1.49178300  | -0.13577200 |  |  |
| H         | 4.75750300  | -1.58727400 | -0.47282100 | H  | -1.30063300 | 2.51763500  | 0.32267500  |  |  |
| O         | -3.96584200 | -1.80557200 | 0.02744400  | O  | 1.39283700  | -1.70656000 | -0.18954600 |  |  |
| H         | -4.01439700 | -2.75661400 | 0.15960900  | H  | 2.33123800  | -1.49175500 | -0.13582100 |  |  |
| H         | -4.75727300 | -1.58808100 | -0.47314700 | H  | 1.30073100  | -2.51744500 | 0.32319200  |  |  |
| O         | 0.00043600  | 2.14813800  | -1.22627800 | O  | -0.00009200 | -0.00024500 | -2.10932400 |  |  |
| H         | 0.00063800  | 2.27181300  | -2.18151000 | H  | -0.45287800 | 0.62096300  | -2.68885000 |  |  |
| H         | 0.00036300  | 3.02516900  | -0.82816500 | H  | 0.45273400  | -0.62157400 | -2.68868900 |  |  |

  

| <b>5E</b> |             |             |             |
|-----------|-------------|-------------|-------------|
| Ti        | 0.33257200  | -0.26407700 | -0.15436800 |
| O         | 0.99226200  | 1.21993600  | -0.08620200 |
| O         | -1.71667500 | -0.02005600 | -0.13437400 |
| H         | -2.50644100 | -0.59496000 | -0.01074000 |
| H         | -1.97933600 | 0.93152300  | -0.06468100 |
| O         | -3.75516100 | -1.69061500 | 0.18818100  |
| H         | -4.23838900 | -1.81895800 | 1.01029700  |
| H         | -4.37438400 | -1.93478800 | -0.50664200 |
| O         | 1.97944700  | -1.56262500 | -0.05436300 |
| H         | 2.16147400  | -2.49564900 | 0.09159300  |
| H         | 2.82878300  | -1.04565400 | 0.05633900  |
| O         | 3.88718900  | 0.13240900  | 0.29075400  |
| H         | 3.50491300  | 1.01405800  | 0.20942600  |
| H         | 4.79708100  | 0.20596500  | -0.01183800 |
| O         | -1.89221000 | 2.58540400  | 0.13412200  |
| H         | -0.99929900 | 2.94576100  | 0.09736500  |
| H         | -2.46979500 | 3.28679000  | -0.17998100 |

**TiO(H<sub>2</sub>O)<sub>6</sub><sup>+</sup>**

| <b>6A</b> |             |             |             | <b>6B</b> |             |             |             |
|-----------|-------------|-------------|-------------|-----------|-------------|-------------|-------------|
| Ti        | 0.47331300  | -0.00480200 | 0.05476400  | Ti        | 0.63774300  | 0.03123000  | 0.14172700  |
| O         | 0.98137100  | -2.14932100 | -0.19969300 | O         | 2.64556100  | -0.65342000 | -0.60696700 |
| H         | 1.09761500  | -2.70582700 | 0.57770200  | H         | 3.25185200  | -0.77303400 | 0.13525600  |
| H         | 0.47610900  | -2.66644500 | -0.83616800 | H         | 3.17032700  | -0.29515800 | -1.33074900 |
| O         | 1.27919600  | -0.01281300 | 1.71818900  | O         | 0.62973000  | 1.53316800  | -1.00213600 |
| H         | 1.68229700  | -0.02803600 | 2.58464700  | H         | 1.32730200  | 1.97349600  | -1.49343900 |
| O         | -1.44835800 | -0.53784000 | 0.92740800  | O         | -1.59888400 | 2.87274900  | -0.04549500 |
| H         | -2.30209800 | -0.34277200 | 0.48700100  | H         | -2.18285700 | 3.53017900  | -0.43092400 |
| H         | -1.58143400 | -0.39828700 | 1.86953400  | H         | -0.83432200 | 2.77485300  | -0.63680900 |
| O         | 2.40223100  | 0.53945400  | -0.90853200 | O         | -1.38915200 | 0.40200900  | 0.62446100  |
| H         | 2.46381700  | 0.34889000  | -1.85135100 | H         | -2.11015000 | -0.22136700 | 0.46889200  |
| H         | 3.24011200  | 0.27209200  | -0.51624200 | H         | -1.71069900 | 1.32568900  | 0.45081500  |
| O         | 0.03783600  | 2.15865700  | 0.28181400  | O         | 1.34415600  | -0.24263500 | 1.78843100  |
| H         | 0.53676700  | 2.65119900  | 0.94261200  | H         | 1.31133600  | -0.13285600 | 2.73989200  |
| O         | -0.23794800 | 0.01288400  | -1.65600100 | O         | -2.72703000 | -2.07140400 | -0.16884300 |
| H         | -0.90450800 | 0.02374500  | -2.34150000 | H         | -3.40325800 | -2.11273500 | -0.85539900 |
| H         | 0.02456700  | 2.70526400  | -0.51122700 | H         | -3.05132600 | -2.66357900 | 0.52017000  |
| O         | -3.81100700 | -0.00548600 | -0.28237400 | O         | -0.06516000 | -1.77972000 | -0.71249700 |
| H         | -4.52166800 | -0.64806700 | -0.36871600 | H         | 0.47586800  | -2.48927800 | -1.07261100 |
| H         | -4.25102300 | 0.84961400  | -0.28758600 | H         | -0.98819300 | -2.08923700 | -0.62873200 |
| <b>6C</b> |             |             |             | <b>6D</b> |             |             |             |
| Ti        | 0.41623900  | -0.07416000 | -0.27669500 | Ti        | -0.69491300 | 0.02588700  | 0.03559300  |
| O         | 1.67106900  | -0.60895900 | 1.52087900  | O         | -1.71714100 | -0.37585600 | -1.48837800 |
| H         | 1.24240000  | -0.77019300 | 2.36934300  | H         | -2.19711500 | 0.12818600  | -2.14775900 |
| H         | 2.28097100  | -1.34244000 | 1.37710600  | O         | -0.48026600 | 2.20419600  | -0.32974600 |
| O         | 1.56026500  | -1.14645000 | -1.18636500 | H         | -0.29144700 | 2.60506700  | -1.18423700 |
| H         | 1.88211100  | -1.48050500 | -2.02527600 | H         | -1.08140100 | 2.79945700  | 0.13147000  |
| O         | 1.59148800  | 1.76757700  | -0.14279700 | O         | -0.73811400 | -2.16321200 | 0.15041200  |
| H         | 2.47587400  | 1.75476200  | 0.24158200  | H         | -0.75558100 | -2.68931700 | 0.95633000  |
| H         | 1.59204700  | 2.45854300  | -0.81422100 | H         | -1.45666000 | -2.47479600 | -0.41613600 |
| O         | -1.02020800 | -1.68011000 | 0.12984800  | O         | -1.56801800 | 0.39594300  | 1.61024500  |
| H         | -1.95084100 | -1.38371800 | 0.10133000  | H         | -2.43358500 | 0.37714000  | 2.02154900  |
| H         | -0.96444600 | -2.49179100 | -0.38518300 | O         | 3.53718100  | -0.10243400 | -0.03020000 |
| O         | -0.91819200 | 0.78688100  | -1.37210400 | H         | 4.08462300  | -0.88647900 | 0.09420900  |
| H         | -0.80128600 | 1.38950700  | -2.11053100 | H         | 4.17240400  | 0.60529700  | -0.18928400 |
| O         | -2.96666900 | 0.15987500  | 0.13985200  | O         | 1.09098500  | -0.00649700 | 1.41022600  |
| H         | -3.90945500 | 0.32574800  | 0.05003400  | H         | 2.03185600  | 0.10924500  | 1.21438400  |
| H         | -2.50874600 | 0.54885000  | -0.64121300 | H         | 0.91246400  | 0.35202200  | 2.28596400  |
| O         | -0.70104100 | 0.75547800  | 1.51202300  | O         | 1.05374000  | -0.04991100 | -1.35604900 |
| H         | -0.56632200 | 1.67592300  | 1.76328900  | H         | 1.98527900  | -0.17638200 | -1.11081800 |
| H         | -1.66327000 | 0.67249800  | 1.35035000  | H         | 0.89032400  | -0.53677600 | -2.17080100 |
| <b>6E</b> |             |             |             |           |             |             |             |
| Ti        | 0.30277000  | 0.03737300  | -0.22736100 |           |             |             |             |
| O         | 0.42170700  | -0.84526400 | 1.83663300  |           |             |             |             |
| H         | 0.72540700  | -0.41705500 | 2.64408800  |           |             |             |             |
| H         | -0.31299900 | -1.42560900 | 2.06777700  |           |             |             |             |
| O         | -1.01033400 | -1.36544500 | -0.42371300 |           |             |             |             |
| H         | -0.83841800 | -2.20410500 | -0.86085100 |           |             |             |             |
| O         | 2.09171300  | -1.27035500 | -0.48377800 |           |             |             |             |
| H         | 2.25862300  | -2.08660500 | -0.00027500 |           |             |             |             |
| H         | 2.44928100  | -1.39194600 | -1.37068100 |           |             |             |             |
| O         | -1.27829100 | 1.34425800  | 0.42385100  |           |             |             |             |
| H         | -2.18298600 | 0.92122700  | 0.33562900  |           |             |             |             |
| H         | -1.36622800 | 2.22153900  | 0.03694200  |           |             |             |             |
| O         | 0.71739700  | 0.86580300  | -1.78380500 |           |             |             |             |
| H         | 0.48091900  | 1.05563300  | -2.69330300 |           |             |             |             |
| O         | -3.32791100 | -0.08049100 | -0.09921100 |           |             |             |             |
| H         | -2.73427500 | -0.83373600 | -0.29558700 |           |             |             |             |
| H         | -4.11008100 | -0.42546900 | 0.33824200  |           |             |             |             |
| O         | 1.73994900  | 1.36115500  | 0.91602100  |           |             |             |             |
| H         | 2.62947400  | 1.42373800  | 0.54810000  |           |             |             |             |
| H         | 1.50650700  | 2.26289600  | 1.16387600  |           |             |             |             |

**TiO(H<sub>2</sub>O)<sub>7</sub><sup>+</sup>**

| <b>7A</b> |             |             |             | <b>7B</b> |             |             |             |
|-----------|-------------|-------------|-------------|-----------|-------------|-------------|-------------|
| Ti        | 0.02424000  | 0.02145600  | -0.18034000 | Ti        | -0.02480000 | 0.39777900  | -0.22679700 |
| O         | -1.18787000 | 0.64441600  | 1.54895500  | O         | 2.74311000  | -1.56535300 | 0.06159600  |
| H         | -1.03009300 | 0.48071800  | 2.48366800  | H         | 3.60227400  | -1.97934000 | -0.06036800 |
| H         | -2.14955100 | 0.63197800  | 1.38744100  | H         | 2.60995900  | -0.93666200 | -0.68482500 |
| O         | -1.26277000 | 0.97047600  | -1.25060300 | O         | 1.56509300  | 0.31980000  | -1.30888500 |
| H         | -1.07931600 | 1.68999100  | -1.86070600 | H         | 1.94135300  | 1.03969800  | -1.82237200 |
| O         | -3.35332600 | 0.07310500  | 0.00818400  | O         | 0.08539800  | 2.56678300  | 0.18428600  |
| H         | -4.29150400 | 0.20192300  | -0.15822600 | H         | 0.90646700  | 2.97428500  | 0.48387900  |
| H         | -2.85134600 | 0.57519400  | -0.67874600 | H         | -0.35713300 | 3.21551100  | -0.37466600 |
| O         | 1.31311400  | 1.68454900  | 0.22661400  | O         | 0.02103200  | -1.73565600 | -0.02033500 |
| H         | 2.26564800  | 1.49231700  | 0.15095400  | H         | -0.75189200 | -2.30771300 | -0.10546700 |
| H         | 1.16529500  | 2.62522900  | 0.09156000  | H         | 0.84988900  | -2.23074600 | -0.11743900 |
| O         | 1.15934300  | -0.77908300 | -1.44237500 | O         | -1.47099100 | 0.48746400  | -1.39527500 |
| H         | 0.97899700  | -0.93713000 | -2.37353900 | H         | -1.43852200 | 0.54505000  | -2.35523200 |
| O         | 3.36168500  | -0.06486000 | -0.04478700 | O         | -2.79335200 | -1.52478000 | 0.01459900  |
| H         | 4.30825100  | -0.17164500 | -0.18024000 | H         | -3.64304400 | -1.97293800 | -0.04143000 |
| H         | 2.91164000  | -0.46738100 | -0.81403100 | H         | -2.75213700 | -0.91157300 | -0.73904600 |
| O         | 1.23231500  | -0.86812600 | 1.45438100  | O         | -1.45297700 | 0.30633900  | 1.47966200  |
| H         | 1.08675500  | -1.76170700 | 1.78269200  | H         | -1.93892200 | 1.07865100  | 1.78758600  |
| H         | 2.18525200  | -0.79001700 | 1.26068000  | H         | -2.12508400 | -0.37544100 | 1.27465700  |
| O         | -1.32768700 | -1.68808400 | -0.04956100 | O         | 1.36771500  | 0.31674700  | 1.49792300  |
| H         | -1.25014300 | -2.43013100 | -0.65827700 | H         | 1.02422700  | 0.03915700  | 2.35482900  |
| H         | -2.26159700 | -1.39052000 | -0.07221600 | H         | 2.09794500  | -0.29981600 | 1.28086500  |
| <b>7C</b> |             |             |             | <b>7D</b> |             |             |             |
| Ti        | 0.09006000  | -0.38623500 | -0.20273600 | Ti        | -0.24887900 | 0.45089900  | 0.09615500  |
| O         | -3.16761400 | 1.26081100  | 0.00535900  | O         | -3.35741800 | -1.40043100 | -0.07382900 |
| H         | -3.84420600 | 1.72024800  | -0.49815400 | H         | -3.00672100 | -0.77787700 | -0.74339000 |
| H         | -2.95641100 | 0.43614300  | -0.47538700 | H         | -3.92987700 | -2.02040700 | -0.53208000 |
| O         | -1.68553800 | -0.83946500 | -0.78153500 | O         | -1.60958000 | 0.24994600  | -1.25611000 |
| H         | -1.93557400 | -1.65360200 | -1.22740900 | H         | -1.76221800 | 0.87569200  | -1.96931100 |
| O         | 0.97025400  | -2.40892300 | -0.53004800 | O         | 0.76520600  | 2.16942300  | -0.91347200 |
| H         | 0.63562600  | -3.23001600 | -0.15357700 | H         | 0.98973000  | 2.24754000  | -1.84589700 |
| H         | 1.40255400  | -2.63644600 | -1.36053300 | H         | 0.52964400  | 3.05105100  | -0.60395500 |
| O         | -0.67030000 | 1.42416500  | 0.57740100  | O         | -0.98687000 | -1.38322000 | 0.88825400  |
| H         | -0.12842300 | 2.22347100  | 0.54158900  | H         | -0.84229400 | -1.64646200 | 1.80164300  |
| H         | -1.62237100 | 1.63729400  | 0.38597200  | H         | -1.93288400 | -1.59089500 | 0.64677200  |
| O         | 1.07066600  | 0.31629900  | -1.62038400 | O         | -0.67128700 | 1.61103400  | 1.44479200  |
| H         | 0.82353200  | 0.40463900  | -2.54562700 | H         | -1.42982200 | 1.99484700  | 1.88883100  |
| O         | 1.93975200  | 2.43325100  | 0.01422600  | O         | 3.48946100  | -1.45320800 | -0.15582800 |
| H         | 2.50815900  | 3.20452800  | -0.07447600 | H         | 3.68252900  | -2.33994100 | 0.17047200  |
| H         | 1.89983300  | 2.01267200  | -0.86113300 | H         | 4.32153400  | -1.15937600 | -0.54456000 |
| O         | 1.81121100  | 0.00646400  | 1.15166100  | O         | 1.58517500  | 0.03848300  | 1.33845100  |
| H         | 2.60455600  | -0.53863400 | 1.11739600  | H         | 2.44406500  | -0.30701100 | 1.05475000  |
| H         | 2.11008800  | 0.92769500  | 1.00436800  | H         | 1.73499100  | 0.68172400  | 2.03946100  |
| O         | -0.50443000 | -1.37964000 | 1.71104400  | O         | 1.06126300  | -0.65783300 | -1.32574200 |
| H         | -0.13172200 | -1.07139300 | 2.54559900  | H         | 1.88994100  | -1.11245600 | -1.09909300 |
| H         | -1.45897600 | -1.44314100 | 1.83978400  | H         | 0.57911700  | -1.20974300 | -1.95116500 |
| <b>7E</b> |             |             |             | <b>7F</b> |             |             |             |
| Ti        | -0.00086700 | 0.00557500  | 0.00830800  | Ti        | -0.49235300 | -0.58067100 | -0.03590300 |
| O         | 0.53235700  | -2.13455300 | -0.26083900 | O         | -1.09145900 | 2.97071100  | 0.12132600  |
| H         | 0.51961500  | -2.70096600 | 0.51810300  | H         | -1.45697500 | 3.77213300  | 0.50465400  |
| H         | 0.04551800  | -2.60573200 | -0.94595300 | H         | -1.74900500 | 2.25849700  | 0.26077500  |
| O         | 0.72975300  | -0.00300200 | 1.71390500  | O         | -2.05448900 | 0.47857000  | 0.39539100  |
| H         | 1.35829900  | -0.01842800 | 2.43365600  | H         | -2.67146700 | 0.27636800  | 1.10369500  |
| O         | -1.89578300 | -0.61388000 | 0.90679600  | O         | -0.02955800 | -1.20072600 | 2.04263200  |
| H         | -2.76651600 | -0.37663700 | 0.52692300  | H         | 0.00053200  | -0.57038700 | 2.77001400  |
| H         | -1.95659000 | -0.47458600 | 1.85703100  | H         | -0.3829400  | -2.02479800 | 2.39442300  |
| O         | 1.88998900  | 0.62580800  | -0.89641200 | O         | -0.79205100 | 0.37110400  | -1.95223600 |
| H         | 1.94466800  | 0.49194700  | -1.84780000 | H         | -0.47869600 | 0.09866200  | -2.81998100 |
| H         | 2.76378500  | 0.38734400  | -0.52471100 | H         | -1.65876500 | 0.78094800  | -2.06275400 |
| O         | -0.53203400 | 2.14591800  | 0.27798500  | O         | -0.90795400 | -2.30633100 | -0.46621700 |
| H         | -0.04463600 | 2.61635600  | 0.96322700  | H         | -1.61846900 | -2.90246900 | -0.70745200 |
| O         | -0.73155600 | 0.01382200  | -1.69799900 | O         | 3.47069400  | 0.78734100  | -0.04096900 |
| H         | -1.37452500 | 0.02291700  | -2.40503100 | H         | 3.93595200  | 1.24482200  | -0.75078000 |
| H         | -0.51842900 | 2.71252900  | -0.50080100 | H         | 4.10698200  | 0.76907700  | 0.68298000  |
| O         | -4.31992000 | -0.02719400 | -0.16879600 | O         | 1.56448100  | -1.15820500 | -0.73763100 |
| H         | -4.74841600 | 0.83344500  | -0.17984900 | H         | 2.40729700  | -0.73585400 | -0.50946500 |
| H         | -5.04171100 | -0.66194000 | -0.20192300 | H         | 1.71259100  | -2.10562200 | -0.82419600 |

|   |            |             |            |   |            |            |            |
|---|------------|-------------|------------|---|------------|------------|------------|
| O | 4.33128800 | -0.01442500 | 0.10984800 | O | 0.69644500 | 1.13730700 | 0.61784300 |
| H | 4.73392900 | -0.88738100 | 0.10038000 | H | 1.62741400 | 1.28259900 | 0.39498300 |
| H | 5.07133200 | 0.59854600  | 0.14806800 | H | 0.20842600 | 1.99263100 | 0.51185300 |

**7G**

|    |             |             |             |
|----|-------------|-------------|-------------|
| Ti | -0.00653900 | -0.51192800 | -0.01545500 |
| O  | -1.47746900 | 0.65607900  | -1.12586300 |
| H  | -2.12310000 | 1.22810600  | -0.66189200 |
| H  | -1.17929300 | 1.14037300  | -1.90136400 |
| O  | -1.11632300 | -0.57059600 | 1.48160000  |
| H  | -1.85828900 | -0.26076900 | 1.99941300  |
| O  | 0.97631300  | 1.29004600  | 0.72210200  |
| H  | 1.85694100  | 1.56576700  | 0.39301100  |
| H  | 0.98690500  | 1.41501800  | 1.67568100  |
| O  | -0.92595500 | -2.39922600 | -0.76076300 |
| H  | -0.81634200 | -2.58127200 | -1.70055500 |
| H  | -1.84219600 | -2.59987700 | -0.54277600 |
| O  | 1.36107400  | -1.76115500 | 1.21832600  |
| H  | 0.91315100  | -2.14395600 | 1.98193800  |
| O  | 1.11594800  | -0.61153100 | -1.48576500 |
| H  | 1.78726300  | -0.41557600 | -2.13714600 |
| H  | 1.85779900  | -2.47541300 | 0.80553900  |
| O  | 3.39050700  | 2.08205700  | -0.22881600 |
| H  | 4.22356900  | 1.62543500  | -0.07988100 |
| H  | 3.63617400  | 2.99882200  | -0.38444900 |
| O  | -3.31043300 | 2.14228400  | 0.21655200  |
| H  | -4.24600800 | 2.13073800  | -0.00731400 |
| H  | -3.16202100 | 3.01135200  | 0.60081200  |
